# Supplementary material
Source: PubMed Central journal article supplement (PMC4784753)
Supplement: turp029119.ww1_default.pdf [file turp029119.ww1_default.pdf]

**Table E1: AEFI reported within 2 hours of LAIV administration**

| Study ID number | Time to symptoms (minutes) | Description of events                                                                                                                                                                                                                          | IDMC review: possible allergic aetiology? | Causality |
|-----------------|----------------------------|------------------------------------------------------------------------------------------------------------------------------------------------------------------------------------------------------------------------------------------------|-------------------------------------------|-----------|
| <b>BR/005</b>   | 20-60                      | Generalised urticarial following LAIV. Negative allergy testing and tolerated 2 <sup>nd</sup> dose of LAIV. Reaction attributed to milk present in ingredients of snack eaten following 1 <sup>st</sup> dose of LAIV (child has milk allergy). | NO                                        |           |
| <b>CA/011</b>   | 5-20                       | Red itchy nose                                                                                                                                                                                                                                 | YES                                       | Probable  |
| <b>ED/054</b>   | 5-20                       | Itchy naso-oropharynx. Facial flushing; no hives                                                                                                                                                                                               | YES                                       | Probable  |
| <b>LE/005</b>   | 5-20                       | Felt as if wanted to sneeze, but no actual sneezing. No significant change in TNSS.                                                                                                                                                            | NO                                        |           |
| <b>LE/020</b>   | 5-20                       | Pre-existing nasal symptoms due to mild cold.                                                                                                                                                                                                  | NO                                        |           |
| <b>LP/001</b>   | 5-20                       | Large hive on face-disappeared in minutes. Scratching both sides of face, transient                                                                                                                                                            | YES                                       | Possible  |
| <b>LP/016</b>   | 20-60                      | Itchy erythema/ hives on forehead; eczema flare on arms 30 mins post LAIV                                                                                                                                                                      | YES                                       | Probable  |
| <b>NW/018</b>   | 20-60                      | Local rhinitis symptoms at 30 mins post LAIV                                                                                                                                                                                                   | YES                                       | Possible  |
| <b>OX/006</b>   | 1-5                        | Itchy nose and skin - ?due to contact reaction, no visible urticaria                                                                                                                                                                           | YES                                       | Possible  |
| <b>OX/020</b>   | 20-60                      | Single episode of vomiting, 45 mins after LAIV. Does not meet BCC criteria for systemic reaction.                                                                                                                                              | NO                                        |           |
| <b>OX/022</b>   | 5-20                       | Contact urticarial reaction                                                                                                                                                                                                                    | YES                                       | Probable  |
| <b>RL/031</b>   | 5-20                       | Mother reported mild R facial swelling. Negative allergy testing and tolerated 2 <sup>nd</sup> dose of LAIV without any similar symptoms.                                                                                                      | NO                                        |           |
| <b>SF/025</b>   | 20-60                      | 3 hives on chin 25 mins post LAIV, resolved in <15mins                                                                                                                                                                                         | YES                                       | Probable  |
| <b>UC/006</b>   | 5-20                       | Mild nasal itch, no change in TNSS. No objective symptoms. Tolerated 2 <sup>nd</sup> dose without issue.                                                                                                                                       | NO                                        |           |
| <b>UC/001</b>   | 60-120                     | Itchy tongue and neck                                                                                                                                                                                                                          | YES                                       | Possible  |
| <b>SM/066</b>   | 20-60                      | Sore 'tummy' 40mins post LAIV, onset shortly after eating a take-away from local restaurant. Family member (not receiving LAIV) had same symptoms.                                                                                             | NO                                        |           |
| <b>MA/023</b>   | 60-120                     | Not Itchy                                                                                                                                                                                                                                      | NO                                        |           |

**Table E2: Incidence of AEFI of allergic aetiology, by factor of interest.**

| <b>Factor</b>                                                     | <b>Level</b> | <b>n/N</b>   | <b>P value</b> |
|-------------------------------------------------------------------|--------------|--------------|----------------|
| Age group (years)                                                 | 2-4          | 5/360 (1.4%) | 0.24           |
|                                                                   | 5-11         | 2/334 (0.6%) |                |
|                                                                   | 12-18        | 2/85 (2.4%)  |                |
| Physician-assessed clinical reaction to egg in previous 12 months | No           | 4/464 (0.9%) | 0.50           |
|                                                                   | Yes          | 5/315 (1.6%) |                |
| 95% PPV criteria met for egg allergy within previous 12months     | No           | 3/326 (0.9%) | 0.74           |
|                                                                   | Yes          | 6/453 (1.3%) |                |
| Previous anaphylaxis to egg                                       | No           | 7/622 (1.1%) | 1.00           |
|                                                                   | Yes          | 2/157 (1.3%) |                |
| Previous reported reaction to aerosolised egg                     | No           | 6/709 (0.8%) | 0.04           |
|                                                                   | Yes          | 3/70 (4.3%)  |                |
| Tolerance to baked egg in diet                                    | No           | 5/436 (1.1%) | 1.00           |
|                                                                   | Yes          | 4/343 (1.2%) |                |
| Previous influenza vaccine (any)                                  | No           | 3/410 (0.7%) | 0.32           |
|                                                                   | Yes          | 6/369 (1.6%) |                |
| Previous LAIV                                                     | No           | 7/591 (1.2%) | 1.00           |
|                                                                   | Yes          | 2/188 (1.1%) |                |
| Diagnosis of asthma or recurrent wheeze                           | No           | 3/334 (0.9%) | 0.74           |
|                                                                   | Yes          | 6/445 (1.3%) |                |
| Batch ovalbumin content >1.0 ng/ml                                | No           | 2/268 (0.7%) | 0.73           |
|                                                                   | Yes          | 7/511 (1.4%) |                |
| Batch ovalbumin content >0.3 ng/ml                                | No           | 1/112 (0.9%) | 1.00           |
|                                                                   | Yes          | 8/667 (1.2%) |                |

**Table E3: Incidence of delayed events within 72 hours of LAIV administration, by factor of interest.**

| <b>Factor</b>                                                     | <b>Level</b> | <b>n/N</b>      | <b>P</b> |
|-------------------------------------------------------------------|--------------|-----------------|----------|
| Age group (years)                                                 | 2-4          | 112/360 (0.3%)  | 0.07     |
|                                                                   | 5-11         | 93/334 (0.3%)   |          |
|                                                                   | 12-18        | 16/85 (18.8%)   |          |
| Physician-assessed clinical reaction to egg in previous 12 months | No           | 140/464 (30.2%) | 0.20     |
|                                                                   | Yes          | 81/315 (25.7%)  |          |
| 95% PPV criteria met for egg allergy within previous 12 months    | No           | 101/326 (31.0%) | 0.17     |
|                                                                   | Yes          | 120/453 (26.5%) |          |
| Previous anaphylaxis to egg                                       | No           | 180/622 (28.9%) | 0.55     |
|                                                                   | Yes          | 41/157 (26.1%)  |          |
| Previous reported reaction to aerosolised egg                     | No           | 199/709 (28.1%) | 0.58     |
|                                                                   | Yes          | 22/70 (31.4%)   |          |
| Tolerance to baked egg in diet                                    | No           | 120/436 (27.5%) | 0.58     |
|                                                                   | Yes          | 101/343 (29.4%) |          |
| Previous influenza vaccine (any)                                  | No           | 123/410 (30.0%) | 0.30     |
|                                                                   | Yes          | 98/369 (26.6%)  |          |
| Previous LAIV                                                     | No           | 176/591 (29.8%) | 0.14     |
|                                                                   | Yes          | 45/188 (23.9%)  |          |
| Diagnosis of asthma or recurrent wheeze                           | No           | 92/334 (27.5%)  | 0.69     |
|                                                                   | Yes          | 129/445 (29.0%) |          |
| Batch ovalbumin content >1.0 ng/ml                                | No           | 80/268 (29.9%)  | 0.51     |
|                                                                   | Yes          | 141/511 (27.6%) |          |
| Batch ovalbumin content >0.3 ng/ml                                | No           | 28/112 (25.0%)  | 0.43     |
|                                                                   | Yes          | 193/667 (28.9%) |          |
